# Supplementary material
Source: Springer Nature journal article supplement (https://www.springermedizin.de/resource/supplementary/12985_2009_786_MOESM10_ESM.pdf/9609192)

**A**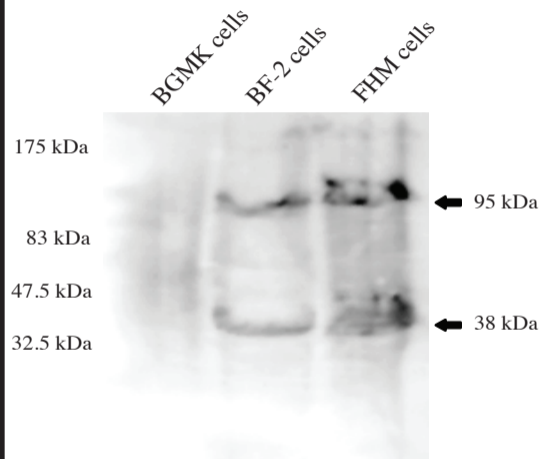**B**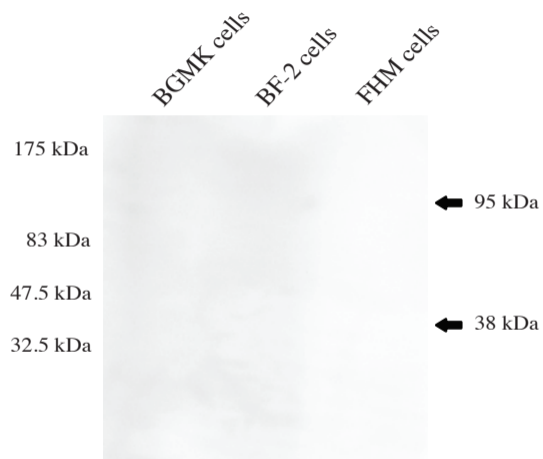**C**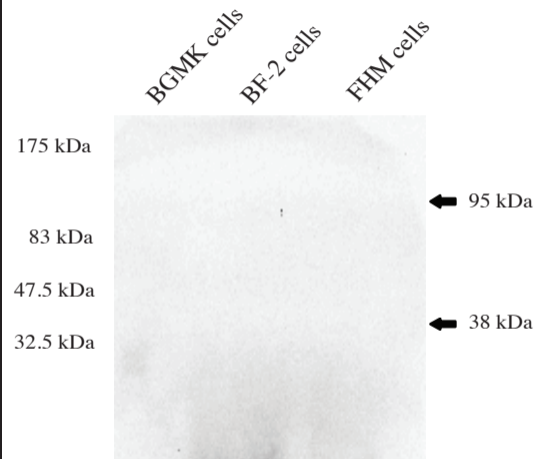

Supplement: MOESM10 [file 9609192]
